# Supplementary material
Source: publisher site journal article supplement (https://www.dovepress.com/article/392056)
Supplement: Supplementary file 1 [file get_supplementary_file.php]

**Supplemental data**

# ARFIP2 regulates EMT and autophagy in hepatocellular carcinoma in part through the PI3K/ Akt signalling pathway

Kaida Huang2

Yubiao Lin2

Min Deng1,2,3

Keyin Wang3

Jianfen Shen4

Dahai Wei1,3,4

1Institute of Hepatology, Affiliated Hospital of Jiaxing University, Jiaxing, People’s Republic of China;

2Department of Oncology, Xiamen Haicang Hospital, Xiamen, People’s Republic of China;

3Department of Infectious Diseases, Affiliated Hospital of Jiaxing University, Jiaxing, People’s Republic of China;

4Department of Central Laboratory, Affiliated Hospital of Jiaxing University, Jiaxing, People’s Republic of China

Correspondence: Dahai Wei

Institute of Hepatology, Affiliated Hospital of Jiaxing University, Jiaxing, People’s Republic of China.

Tel +86-573-89975669

Fax +86-573-89975669

Email：weidahai3166@hotmail.com,

**Supplemental Figures:**


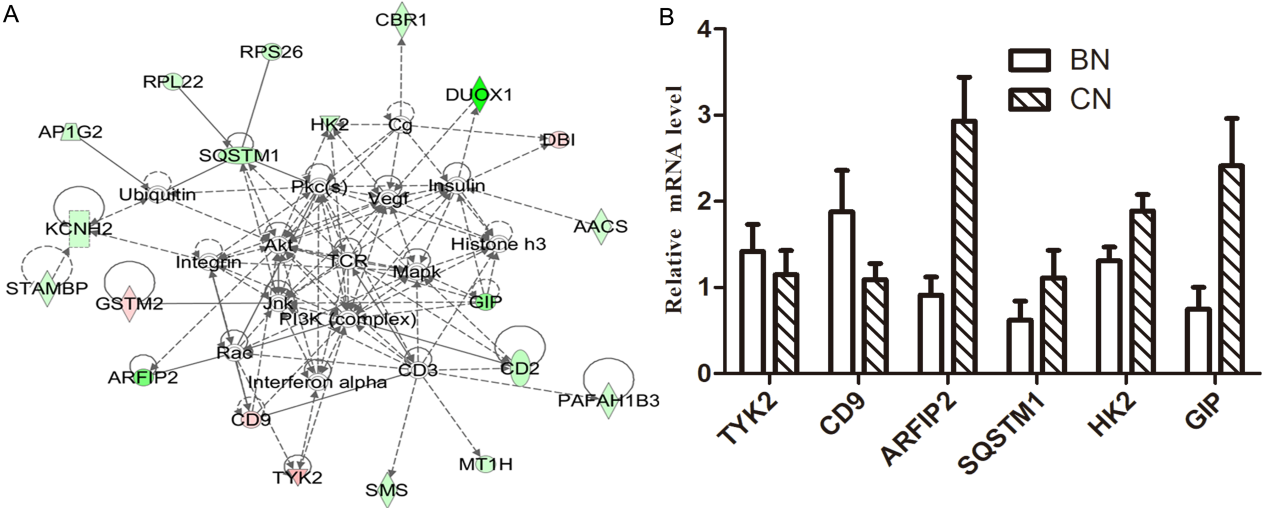


Figure S1 Relationship between the ARFIP2 and PI3K/Akt signalling pathway in HBV genotype B- and genotype-C-induced HCC. (A) ARFIP2 is associated with the PI3K/Akt signalling pathway in HBV genotype B- and genotype-C-induced HCC. (B) ARFIP2 is the key differentially expressed protein related to the PI3K/Akt signalling pathway in HBV genotype B- and genotype-C-induced HCC.

| **Table S1. ARFIP2 siRNA sequences** | | | |
| --- | --- | --- | --- |
| siCtrl | 5'-ACGUGACACGUUCGGAGAATT-3' | | |
| siARFIP2-1 | 5'-UAGGGAUCUCCAUUGUGGCTT-3' | | |
| siARFIP2-1 | 5'-UAGCCACCAGACACAAUGCTT-3' | | |
| siARFIP2-1 | 5'-AUGAGCGUGUCUUCCAUGGTT-3' | | |
|  | | | |
| **Table S2. qPCR primers** | | | |
| ARFIP2-forward | 5’-TGATGCCTACCGAACAGACTT-3’ | | |
| ARFIP2-reverse | 5’-AGCTTCTCATACTTGTCCCGAT-3’ | | |
| BAX-forward | 5'-CCCGAGAGGTCTTTTTCCGAG-3' | | |
| BAX-reverse | 5'-CCAGCCCATGATGGTTCTGAT-3' | | |
| BCL-2-forward | 5'-TGAACCGGCATCTGCACAC-3' | | |
| BCL-2-reverse | 5'-CGTCTTCAGAGACAGCCAGGAG-3 | | |
| P62-2-forward | 5'-AGCTGCCCTCAGCCCTCTA-3' | | |
| P62-2-reverse | 5'- GGCTTCTCTTCCCTCCATGTT-3' | | |
| ATG7-forward | 5'-CAGTTTGCCCCTTTTAGTAGTGC-3' | | |
| ATG7-reverse | 5'-CCAGCCGATACTCGTTCAGC-3' | | |
| Beclin 1-forward | 5'-TTGGCCAATAAGATGGGTCTGAA-3' | | |
| Beclin 1-reverse | 5'-TGTCAGGGACTCCAGATACGAGTG-3' | | |
| LC3B-forward | 5'-GGTGGATTAGGCAGAGATGTGA-3' | | |
| LC3B-reverse | 5'-CCAGCCAGCACCCAAAA-3' | | |
| β-actin-forward | 5’-ATAGCACAGCCTGGATAGCAACGTAC-3’ | | |
| β-actin-reverse | 5’-CACCTTCTACAATGAGCTGCGTGTG-3’ | | |
|  | | | |
| **Table S3 List of antibodies and suppliers** | | | |
| Antibody | Isotype | Suppliers | Cat. No |
| ARFIP2 | Rabbit IgG | Proteintech | 14548-1-AP |
| P62 | Rabbit IgG | Proteintech | 18420-1-AP |
| E-cadherin | Rabbit IgG | Proteintech | 20874-1-AP |
| Vimentin | Rabbit IgG | Proteintech | 10366-1-AP |
| N-cadherin | Rabbit IgG | Proteintech | 22018-1-AP |
| ATG7 | Rabbit IgG | Proteintech | 10088-2-AP |
| Ki67 | Rabbit IgG | Proteintech | 27309-1-AP |
| LC3B | Rabbit IgG | Abcam | ab192890 |
| Akt | Rabbit IgG | Abcam | ab32505 |
| phosphor-Akt | Rabbit IgG | Abcam | ab81283 |
| Beclin-1 | Rabbit IgG | Abcam | ab207612 |
| Bcl-2 | Rabbit IgG | Abcam | ab32124 |
| Snail | Rabbit IgG | Abcam | ab216347 |
| PI3K | Rabbit IgG | Cell signal technology | 4249S |
| Phospho-PI3 K | Rabbit IgG | Cell signal technology | 13857S |
|  | | | |
